# Supplementary material
Source: PubMed Central journal article supplement (PMC3489960)
Supplement: NIHMS412494-supplement-1_si_001.pdf [file NIHMS412494-supplement-1_si_001.pdf]

# SUPPLEMENTARY INFORMATION

## Acid-labile mPEG-Vinyl Ether-1,2-Dioleoylglycerol Lipids with Tunable pH Sensitivity: Synthesis and Structural Effects on Hydrolysis Rates, DOPE Liposome Release Performance and Pharmacokinetics

Junhwa Shin, Pochi Shum, Jessica Grey, Shin-ichi Fujiwara, Guarov S. Malhotra, Andres González-Bonet, Seok-Hee Hyun, Elaine Moase, Teresa M. Allen, & David H. Thompson\*

### Table of Contents

|    |                                                                                                                             |       |
|----|-----------------------------------------------------------------------------------------------------------------------------|-------|
| 1. | Details of DFT Computations                                                                                                 | 2     |
| 2. | Optimized Structures and Energies for CURVE                                                                                 | 3-9   |
| 3. | Synthesis of mPEG-Vinyl Ether Lipids                                                                                        |       |
| a. | Synthesis route for MeO-PEG-1'-oxy-1'-propene-1'-O-1,2-dioleoylglycerol ( <b>ST902</b> & <b>ST905</b> ), <b>Figure S1</b>   | 10    |
| b. | Synthesis route for MeO-PEG-1'-oxyethene-1'-O-1,2-dioleoylglycerol ( <b>ST912</b> & <b>ST915</b> ), <b>Figure S2</b>        | 10    |
| c. | Synthesis route for MeO-PEG-1'-oxy-2'-propene-2'-O-1,2-dioleoylglycerol ( <b>ST502</b> & <b>ST505</b> ), <b>Figure S3</b>   | 11    |
| d. | Synthesis route for MeO-PEG-1'-amido-2'-propene-2'-O-1,2-dioleoylglycerol ( <b>ST152</b> & <b>ST155</b> ), <b>Figure S4</b> | 11    |
| 4. | Detailed Description of MeO-PEG-VE-DOG Lipid Syntheses                                                                      | 12-19 |
| 5. | Hydrolysis Studies by TLC, <b>Figure S5</b>                                                                                 | 19    |
| 6. | Hydrolysis Studies by HPLC & <sup>1</sup> H NMR, <b>Figures S6-11</b>                                                       | 20-22 |
| 7. | Calcein Release Rates for Various mPEG-VE-lipid Loadings in DOPE Liposomes                                                  |       |
| a. | DOPE with <b>ST155</b> and <b>ST305</b> <b>Figure S12</b>                                                                   | 23    |
| b. | DOPE with <b>ST502</b> and <b>ST505</b> , <b>Figure S13</b>                                                                 | 24    |
| 8. | References                                                                                                                  | 25    |

## 1. Details of DFT Computations

Density functional theory (DFT) calculations were used to determine the proton affinity (PA) values of a series of vinyl ethers using Gaussian 03.<sup>1</sup> The DFT method was employed using the B3LYP hybrid functional.<sup>2,3</sup> Neutral and protonated structures were optimized with 6-31G\*\* basis set. Single point energies of the optimized structures were obtained with the cc-pVTZ basis set.<sup>4</sup>

The PA is the negative of the standard enthalpy variation ( $\Delta_r H^\circ$ ) for the reaction,

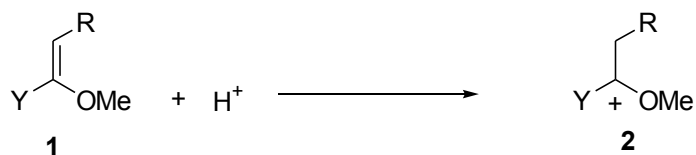

where  $PA(M) = -\Delta_r H_{298K}$ .

**Table S1.** PA values of a series of methyl vinyl ethers **1**.

| CURVE     | R   | Y                         | Neutral (hartree) | Protonated (hartree) | PA (kcal/mol) |
|-----------|-----|---------------------------|-------------------|----------------------|---------------|
| <b>1a</b> | Me  | H                         | -232.5224815      | -232.8665094         | -215.88       |
| <b>1b</b> | H   | Me                        | -232.5219559      | -232.8838625         | -227.10       |
| <b>1c</b> | H   | Ph                        | -424.3222993      | -424.6918630         | -231.90       |
| <b>1d</b> | H   | C(O)OMe                   | -421.152028864    | -421.487347205       | -210.42       |
| <b>1e</b> | H   | OMe                       | -307.7636225      | -308.1461169         | -240.02       |
| <b>1f</b> | Ph  | OMe                       | -538.8910531      | -539.2711618         | -238.52       |
| <b>1g</b> | OMe | OMe                       | -422.3154414      | -422.698326          | -240.26       |
| <b>1h</b> | H   | C(O)NHMe                  |                   |                      | -207.51       |
| <b>1i</b> | H   | CH <sub>2</sub> OC(O)NHMe |                   |                      | -237.32       |

## 2. Optimized Structures and Energies of CURVE

### 1a (neutral)

SCF Done: E(RB+HF-LYP) = -232.522481542 A.U. after 7 cycles

| Center Number | Atomic Number | Atomic Type | Coordinates (Angstroms) |           |           |
|---------------|---------------|-------------|-------------------------|-----------|-----------|
|               |               |             | X                       | Y         | Z         |
| 1             | 6             | 0           | -0.060027               | 0.717308  | -0.061671 |
| 2             | 6             | 0           | 1.269857                | 0.649651  | 0.037431  |
| 3             | 1             | 0           | 1.800768                | 1.595990  | 0.099833  |
| 4             | 8             | 0           | -0.847327               | -0.392121 | -0.213003 |
| 5             | 6             | 0           | 2.074311                | -0.617231 | 0.048552  |
| 6             | 1             | 0           | 1.424148                | -1.494570 | 0.051990  |
| 7             | 1             | 0           | 2.728865                | -0.683900 | -0.830063 |
| 8             | 1             | 0           | 2.724834                | -0.666242 | 0.930694  |
| 9             | 6             | 0           | -2.213206               | -0.209000 | 0.124714  |
| 10            | 1             | 0           | -2.344552               | -0.026996 | 1.199780  |
| 11            | 1             | 0           | -2.656698               | 0.628309  | -0.432402 |
| 12            | 1             | 0           | -2.732874               | -1.129470 | -0.147514 |
| 13            | 1             | 0           | -0.591488               | 1.669478  | -0.062445 |

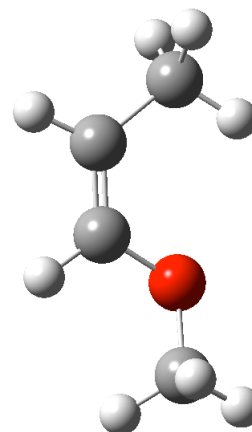

### 2a (protonated)

SCF Done: E(RB+HF-LYP) = -232.866509399 A.U. after 7 cycles

| Center Number | Atomic Number | Atomic Type | Coordinates (Angstroms) |           |           |
|---------------|---------------|-------------|-------------------------|-----------|-----------|
|               |               |             | X                       | Y         | Z         |
| 1             | 6             | 0           | 0.112576                | 0.733999  | -0.000144 |
| 2             | 6             | 0           | -1.347533               | 0.643966  | 0.000028  |
| 3             | 1             | 0           | -1.671553               | 1.259463  | -0.859908 |
| 4             | 8             | 0           | 0.827792                | -0.302836 | -0.000187 |
| 5             | 6             | 0           | -1.964236               | -0.752971 | 0.000074  |
| 6             | 1             | 0           | -1.669022               | -1.318610 | -0.886639 |
| 7             | 1             | 0           | -1.669036               | -1.318550 | 0.886834  |
| 8             | 1             | 0           | -3.051627               | -0.663848 | 0.000071  |
| 9             | 6             | 0           | 2.304226                | -0.247824 | 0.000105  |
| 10            | 1             | 0           | 2.616060                | -0.779838 | -0.897515 |
| 11            | 1             | 0           | 2.636211                | 0.791247  | 0.000421  |
| 12            | 1             | 0           | 2.615752                | -0.780288 | 0.897564  |
| 13            | 1             | 0           | 0.612398                | 1.710424  | 0.000589  |
| 14            | 1             | 0           | -1.671710               | 1.259666  | 0.859702  |

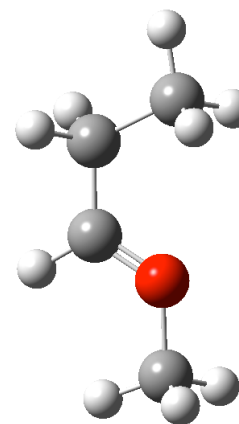

**1b (neutral)**

SCF Done: E(RB+HF-LYP) = -232.521955932 A.U. after 6 cycles

| Center Number | Atomic Number | Atomic Type | Coordinates (Angstroms) |           |           |
|---------------|---------------|-------------|-------------------------|-----------|-----------|
|               |               |             | X                       | Y         | Z         |
| 1             | 6             | 0           | 0.555853                | -0.088060 | -0.040812 |
| 2             | 6             | 0           | 1.623729                | -0.873185 | 0.130449  |
| 3             | 1             | 0           | 2.610492                | -0.446022 | 0.258729  |
| 4             | 8             | 0           | -0.652657               | -0.690063 | -0.315010 |
| 5             | 6             | 0           | -1.835040               | -0.074398 | 0.176131  |
| 6             | 1             | 0           | -1.824869               | 0.014022  | 1.270857  |
| 7             | 1             | 0           | -2.005516               | 0.917886  | -0.259438 |
| 8             | 1             | 0           | -2.658801               | -0.728462 | -0.115971 |
| 9             | 1             | 0           | 1.525188                | -1.952275 | 0.115788  |
| 10            | 6             | 0           | 0.606557                | 1.416443  | -0.037579 |
| 11            | 1             | 0           | 0.022833                | 1.850887  | 0.782185  |
| 12            | 1             | 0           | 1.638248                | 1.754861  | 0.072479  |
| 13            | 1             | 0           | 0.207080                | 1.824805  | -0.973689 |

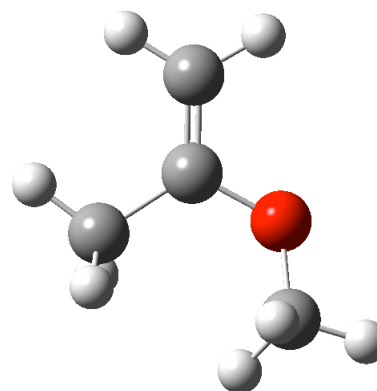**2b (protonated)**

SCF Done: E(RB+HF-LYP) = -232.883862491 A.U. after 6 cycles

| Center Number | Atomic Number | Atomic Type | Coordinates (Angstroms) |           |           |
|---------------|---------------|-------------|-------------------------|-----------|-----------|
|               |               |             | X                       | Y         | Z         |
| 1             | 6             | 0           | -0.467231               | -0.003916 | -0.000275 |
| 2             | 6             | 0           | -1.754276               | -0.727065 | 0.000092  |
| 3             | 1             | 0           | -2.338406               | -0.411857 | 0.875500  |
| 4             | 8             | 0           | 0.574323                | -0.736848 | -0.000068 |
| 5             | 6             | 0           | 1.947293                | -0.203526 | 0.000074  |
| 6             | 1             | 0           | 2.098873                | 0.388338  | -0.903185 |
| 7             | 1             | 0           | 2.098434                | 0.389130  | 0.902884  |
| 8             | 1             | 0           | 2.578372                | -1.088149 | 0.000608  |
| 9             | 1             | 0           | -2.338520               | -0.412369 | -0.875428 |
| 10            | 6             | 0           | -0.394045               | 1.477359  | 0.000007  |
| 11            | 1             | 0           | 0.160588                | 1.828827  | -0.880157 |
| 12            | 1             | 0           | -1.387878               | 1.922980  | -0.000221 |
| 13            | 1             | 0           | 0.159913                | 1.828430  | 0.880776  |
| 14            | 1             | 0           | -1.616406               | -1.807655 | 0.000382  |

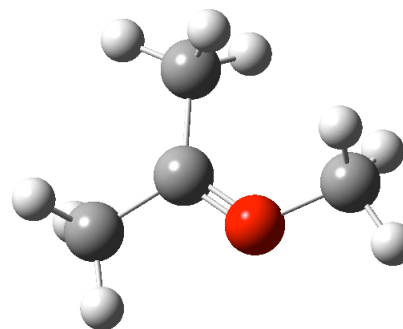

**1c (neutral)**

SCF Done: E(RB+HF-LYP) = -424.322299341 A.U. after 7 cycles

| Center Number | Atomic Number | Atomic Type | Coordinates (Angstroms) |           |           |
|---------------|---------------|-------------|-------------------------|-----------|-----------|
|               |               |             | X                       | Y         | Z         |
| 1             | 6             | 0           | -1.369855               | 0.529381  | -0.296574 |
| 2             | 6             | 0           | -1.886078               | 1.741172  | -0.535789 |
| 3             | 8             | 0           | -2.219425               | -0.561820 | -0.287358 |
| 4             | 6             | 0           | -2.293860               | -1.269440 | 0.950727  |
| 5             | 1             | 0           | -1.314511               | -1.642717 | 1.271504  |
| 6             | 1             | 0           | -2.707874               | -0.629803 | 1.740727  |
| 7             | 1             | 0           | -2.964452               | -2.114355 | 0.782524  |
| 8             | 1             | 0           | -2.957518               | 1.868049  | -0.636928 |
| 9             | 1             | 0           | -1.248479               | 2.605014  | -0.678350 |
| 10            | 6             | 0           | 0.079197                | 0.244392  | -0.139696 |
| 11            | 6             | 0           | 0.945965                | 1.174667  | 0.455418  |
| 12            | 6             | 0           | 0.611915                | -0.967207 | -0.610117 |
| 13            | 6             | 0           | 2.310431                | 0.910431  | 0.557206  |
| 14            | 1             | 0           | 0.540573                | 2.099486  | 0.854310  |
| 15            | 6             | 0           | 1.976011                | -1.231786 | -0.503689 |
| 16            | 1             | 0           | -0.053441               | -1.688295 | -1.073935 |
| 17            | 6             | 0           | 2.830847                | -0.293563 | 0.078133  |
| 18            | 1             | 0           | 2.966862                | 1.640331  | 1.022241  |
| 19            | 1             | 0           | 2.373325                | -2.170233 | -0.879817 |
| 20            | 1             | 0           | 3.893481                | -0.501199 | 0.162883  |

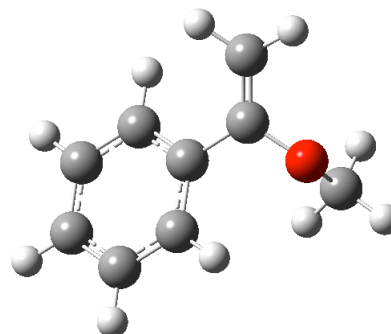**2c (protonated)**

SCF Done: E(RB+HF-LYP) = -424.691862966 A.U. after 8 cycles

| Center Number | Atomic Number | Atomic Type | Coordinates (Angstroms) |           |           |
|---------------|---------------|-------------|-------------------------|-----------|-----------|
|               |               |             | X                       | Y         | Z         |
| 1             | 6             | 0           | -0.601343               | -1.085219 | -0.405770 |
| 2             | 6             | 0           | -0.088144               | 0.190903  | -0.056198 |
| 3             | 6             | 0           | -0.996130               | 1.216424  | 0.315983  |
| 4             | 6             | 0           | -2.355836               | 0.956990  | 0.386491  |
| 5             | 6             | 0           | -2.843744               | -0.308919 | 0.041677  |
| 6             | 6             | 0           | -1.967697               | -1.320194 | -0.369108 |
| 7             | 1             | 0           | 0.053372                | -1.866189 | -0.769089 |
| 8             | 1             | 0           | -0.628790               | 2.201053  | 0.581247  |
| 9             | 1             | 0           | -3.039353               | 1.738541  | 0.699550  |
| 10            | 1             | 0           | -3.910636               | -0.504666 | 0.081796  |
| 11            | 1             | 0           | -2.355094               | -2.288815 | -0.665534 |
| 12            | 6             | 0           | 1.314612                | 0.519913  | -0.129886 |
| 13            | 6             | 0           | 1.797734                | 1.913579  | -0.370434 |
| 14            | 1             | 0           | 1.180148                | 2.433743  | -1.103838 |
| 15            | 8             | 0           | 2.294844                | -0.309986 | 0.003350  |
| 16            | 6             | 0           | 2.238520                | -1.684834 | 0.495014  |
| 17            | 1             | 0           | 1.384368                | -1.821528 | 1.157148  |
| 18            | 1             | 0           | 2.198324                | -2.356078 | -0.363012 |
| 19            | 1             | 0           | 3.179496                | -1.815794 | 1.026321  |
| 20            | 1             | 0           | 1.751684                | 2.475664  | 0.572362  |
| 21            | 1             | 0           | 2.839890                | 1.892103  | -0.690354 |

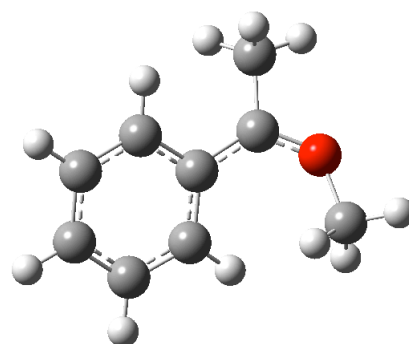

**1d (neutral)**

SCF Done: E(RB+HF-LYP) = -421.152028864 A.U. after 8 cycles

| Center Number | Atomic Number | Atomic Type | Coordinates (Angstroms) |           |           |
|---------------|---------------|-------------|-------------------------|-----------|-----------|
|               |               |             | X                       | Y         | Z         |
| 1             | 6             | 0           | -0.689357               | 0.299235  | -0.000021 |
| 2             | 6             | 0           | -0.898907               | 1.624571  | -0.000028 |
| 3             | 1             | 0           | -0.051403               | 2.294388  | -0.000053 |
| 4             | 8             | 0           | -1.629627               | -0.677483 | 0.000010  |
| 5             | 6             | 0           | 0.682042                | -0.315243 | -0.000045 |
| 6             | 8             | 0           | 0.895272                | -1.506683 | -0.000039 |
| 7             | 1             | 0           | -1.889724               | 2.059842  | -0.000010 |
| 8             | 8             | 0           | 1.655603                | 0.623173  | 0.000006  |
| 9             | 6             | 0           | 2.994160                | 0.103514  | 0.000052  |
| 10            | 1             | 0           | 3.170012                | -0.508317 | -0.888165 |
| 11            | 1             | 0           | 3.647410                | 0.975701  | 0.000090  |
| 12            | 1             | 0           | 3.169917                | -0.508415 | 0.888220  |
| 13            | 6             | 0           | -2.986294               | -0.263345 | 0.000036  |
| 14            | 1             | 0           | -3.581872               | -1.176663 | 0.000058  |
| 15            | 1             | 0           | -3.222076               | 0.329513  | 0.893273  |
| 16            | 1             | 0           | -3.222112               | 0.329501  | -0.893187 |

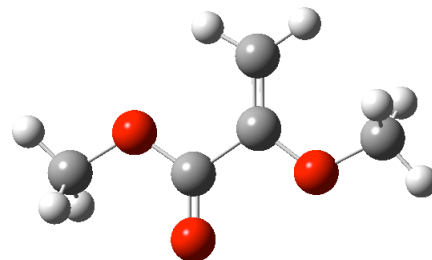**2d (protonated)**

SCF Done: E(RB+HF-LYP) = -421.487347205 A.U. after 8 cycles

| Center Number | Atomic Number | Atomic Type | Coordinates (Angstroms) |           |           |
|---------------|---------------|-------------|-------------------------|-----------|-----------|
|               |               |             | X                       | Y         | Z         |
| 1             | 6             | 0           | 0.720395                | 0.311619  | 0.000021  |
| 2             | 8             | 0           | 1.200907                | -0.856823 | -0.000268 |
| 3             | 6             | 0           | 2.651333                | -1.140141 | -0.000214 |
| 4             | 1             | 0           | 3.089470                | -0.711092 | -0.902068 |
| 5             | 1             | 0           | 3.087895                | -0.716787 | 0.905112  |
| 6             | 1             | 0           | 2.711858                | -2.224870 | -0.003492 |
| 7             | 6             | 0           | -0.815028               | 0.401108  | 0.000029  |
| 8             | 8             | 0           | -1.335405               | 1.491973  | -0.000680 |
| 9             | 8             | 0           | -1.370480               | -0.789142 | 0.000415  |
| 10            | 6             | 0           | -2.832882               | -0.817389 | 0.000117  |
| 11            | 1             | 0           | -3.091483               | -1.873003 | 0.000583  |
| 12            | 1             | 0           | -3.203963               | -0.314832 | 0.894355  |
| 13            | 1             | 0           | -3.203585               | -0.315713 | -0.894772 |
| 14            | 6             | 0           | 1.516531                | 1.549254  | 0.000582  |
| 15            | 1             | 0           | 2.176432                | 1.571286  | 0.879570  |
| 16            | 1             | 0           | 2.172721                | 1.573980  | -0.881178 |
| 17            | 1             | 0           | 0.858374                | 2.416273  | 0.002944  |

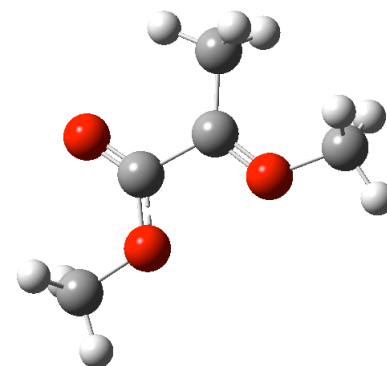

**1e (neutral)**

SCF Done: E(RB+HF-LYP) = -307.763622465 A.U. after 7 cycles

| Center Number | Atomic Number | Atomic Type | Coordinates (Angstroms) |           |           |
|---------------|---------------|-------------|-------------------------|-----------|-----------|
|               |               |             | X                       | Y         | Z         |
| 1             | 6             | 0           | -0.035618               | 0.512160  | -0.000167 |
| 2             | 6             | 0           | -0.738429               | 1.654528  | 0.000308  |
| 3             | 1             | 0           | -1.817295               | 1.667662  | 0.000382  |
| 4             | 8             | 0           | 1.319799                | 0.533666  | -0.000598 |
| 5             | 6             | 0           | 2.029796                | -0.704187 | 0.000432  |
| 6             | 1             | 0           | 1.806714                | -1.299863 | 0.891091  |
| 7             | 1             | 0           | 1.806554                | -1.301427 | -0.889127 |
| 8             | 1             | 0           | 3.085023                | -0.427292 | 0.000100  |
| 9             | 1             | 0           | -0.205510               | 2.594605  | 0.000514  |
| 10            | 8             | 0           | -0.527347               | -0.754098 | -0.000373 |
| 11            | 6             | 0           | -1.941386               | -0.898660 | 0.000113  |
| 12            | 1             | 0           | -2.137149               | -1.971553 | 0.000008  |
| 13            | 1             | 0           | -2.381743               | -0.441002 | 0.893494  |
| 14            | 1             | 0           | -2.382388               | -0.440724 | -0.892806 |

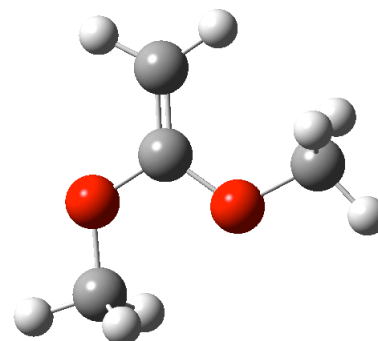**2e (protonated)**

SCF Done: E(RB+HF-LYP) = -308.146116926 A.U. after 7 cycles

| Center Number | Atomic Number | Atomic Type | Coordinates (Angstroms) |           |           |
|---------------|---------------|-------------|-------------------------|-----------|-----------|
|               |               |             | X                       | Y         | Z         |
| 1             | 6             | 0           | -0.002278               | 0.408812  | 0.000205  |
| 2             | 6             | 0           | 0.795354                | 1.662067  | -0.000077 |
| 3             | 8             | 0           | -1.276370               | 0.519921  | 0.000126  |
| 4             | 1             | 0           | 0.127823                | 2.522286  | 0.002677  |
| 5             | 8             | 0           | 0.492456                | -0.779217 | 0.000503  |
| 6             | 6             | 0           | 1.941832                | -1.026474 | -0.000241 |
| 7             | 1             | 0           | 2.028921                | -2.109870 | -0.004068 |
| 8             | 1             | 0           | 2.380874                | -0.598752 | -0.901721 |
| 9             | 1             | 0           | 2.380264                | -0.605226 | 0.904605  |
| 10            | 1             | 0           | 1.439107                | 1.696263  | -0.885953 |
| 11            | 1             | 0           | 1.443683                | 1.693918  | 0.882505  |
| 12            | 6             | 0           | -2.147667               | -0.670778 | -0.000263 |
| 13            | 1             | 0           | -1.945777               | -1.255624 | -0.897120 |
| 14            | 1             | 0           | -1.953529               | -1.249822 | 0.902090  |
| 15            | 1             | 0           | -3.153494               | -0.260573 | -0.005795 |

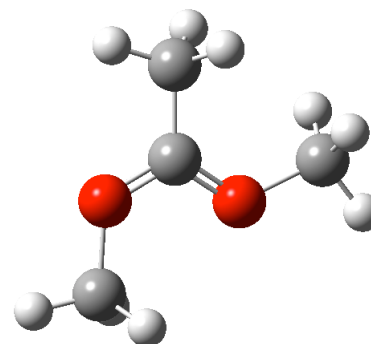

**1f (neutral)**

SCF Done: E(RB+HF-LYP) = -538.891053113 A.U. after 8 cycles

| Center Number | Atomic Number | Atomic Type | Coordinates (Angstroms) |           |           |
|---------------|---------------|-------------|-------------------------|-----------|-----------|
|               |               |             | X                       | Y         | Z         |
| 1             | 6             | 0           | -1.599255               | -0.284304 | -0.217192 |
| 2             | 6             | 0           | -0.459030               | -0.998700 | -0.107160 |
| 3             | 8             | 0           | -2.753380               | -0.930533 | -0.523175 |
| 4             | 6             | 0           | -3.972690               | -0.402943 | 0.008514  |
| 5             | 1             | 0           | -3.962270               | -0.404962 | 1.105633  |
| 6             | 1             | 0           | -4.162783               | 0.611117  | -0.349671 |
| 7             | 1             | 0           | -4.757634               | -1.073359 | -0.343759 |
| 8             | 1             | 0           | -0.602160               | -2.074564 | -0.088689 |
| 9             | 8             | 0           | -1.752453               | 1.064996  | -0.114188 |
| 10            | 6             | 0           | -1.212406               | 1.714356  | 1.046241  |
| 11            | 1             | 0           | -1.771110               | 2.645718  | 1.157587  |
| 12            | 1             | 0           | -1.346525               | 1.090181  | 1.934813  |
| 13            | 1             | 0           | -0.149436               | 1.935109  | 0.922147  |
| 14            | 6             | 0           | 0.924688                | -0.516462 | -0.088664 |
| 15            | 6             | 0           | 1.922892                | -1.318119 | 0.498755  |
| 16            | 6             | 0           | 1.328458                | 0.692248  | -0.691386 |
| 17            | 6             | 0           | 3.257395                | -0.920187 | 0.509428  |
| 18            | 1             | 0           | 1.638466                | -2.263638 | 0.953406  |
| 19            | 6             | 0           | 2.663875                | 1.090631  | -0.676826 |
| 20            | 1             | 0           | 0.588430                | 1.304130  | -1.197701 |
| 21            | 6             | 0           | 3.636472                | 0.291068  | -0.073164 |
| 22            | 1             | 0           | 4.004428                | -1.558282 | 0.973529  |
| 23            | 1             | 0           | 2.948077                | 2.024967  | -1.153418 |
| 24            | 1             | 0           | 4.676795                | 0.602361  | -0.066257 |

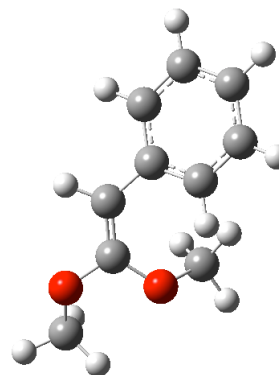**2f (protonated)**

SCF Done: E(RB+HF-LYP) = -539.271161795 A.U. after 8 cycles

| Center Number | Atomic Number | Atomic Type | Coordinates (Angstroms) |           |           |
|---------------|---------------|-------------|-------------------------|-----------|-----------|
|               |               |             | X                       | Y         | Z         |
| 1             | 6             | 0           | 1.688294                | -0.235539 | -0.000428 |
| 2             | 6             | 0           | 0.530602                | -1.203385 | -0.001655 |
| 3             | 8             | 0           | 2.839298                | -0.813732 | 0.000042  |
| 4             | 6             | 0           | 4.085195                | -0.034065 | 0.001025  |
| 5             | 1             | 0           | 4.122618                | 0.582317  | -0.896882 |
| 6             | 1             | 0           | 4.121896                | 0.581154  | 0.899760  |
| 7             | 1             | 0           | 4.869030                | -0.786502 | 0.000861  |
| 8             | 1             | 0           | 0.716931                | -1.851041 | 0.865500  |
| 9             | 8             | 0           | 1.703572                | 1.045698  | 0.000161  |
| 10            | 6             | 0           | 0.557651                | 1.976970  | -0.000706 |
| 11            | 1             | 0           | 1.034187                | 2.954244  | -0.000854 |
| 12            | 1             | 0           | -0.034279               | 1.816625  | -0.898179 |
| 13            | 1             | 0           | -0.035002               | 1.817254  | 0.896410  |
| 14            | 6             | 0           | -0.887759               | -0.681167 | -0.000671 |
| 15            | 6             | 0           | -1.557616               | -0.456379 | -1.210353 |
| 16            | 6             | 0           | -1.556145               | -0.457085 | 1.209969  |
| 17            | 6             | 0           | -2.870449               | 0.017091  | -1.208517 |
| 18            | 1             | 0           | -1.060659               | -0.662295 | -2.155456 |
| 19            | 6             | 0           | -2.868967               | 0.016407  | 1.210014  |
| 20            | 1             | 0           | -1.058047               | -0.663581 | 2.154346  |
| 21            | 6             | 0           | -3.524478               | 0.259823  | 0.001215  |
| 22            | 1             | 0           | -3.384738               | 0.184002  | -2.149425 |
| 23            | 1             | 0           | -3.382109               | 0.182783  | 2.151643  |
| 24            | 1             | 0           | -4.547413               | 0.621955  | 0.001946  |
| 25            | 1             | 0           | 0.716659                | -1.848658 | -0.870656 |

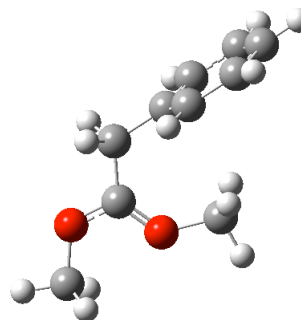



**1g (neutral)**

SCF Done: E(RB+HF-LYP) = -422.315441378 A.U. after 7 cycles

| Center Number | Atomic Number | Atomic Type | Coordinates (Angstroms) |           |           |
|---------------|---------------|-------------|-------------------------|-----------|-----------|
|               |               |             | X                       | Y         | Z         |
| 1             | 6             | 0           | -0.533740               | -0.201858 | -0.289463 |
| 2             | 6             | 0           | 0.650387                | -0.831128 | -0.221651 |
| 3             | 8             | 0           | -1.664193               | -0.956460 | -0.366087 |
| 4             | 6             | 0           | -2.713811               | -0.589319 | 0.535365  |
| 5             | 1             | 0           | -2.379071               | -0.665770 | 1.578224  |
| 6             | 1             | 0           | -3.069457               | 0.426086  | 0.342477  |
| 7             | 1             | 0           | -3.521407               | -1.301965 | 0.361196  |
| 8             | 1             | 0           | 0.669496                | -1.911496 | -0.102836 |
| 9             | 8             | 0           | -0.788433               | 1.130164  | -0.382340 |
| 10            | 6             | 0           | 0.141312                | 2.042836  | 0.203703  |
| 11            | 1             | 0           | -0.365403               | 3.009683  | 0.225460  |
| 12            | 1             | 0           | 0.393948                | 1.736707  | 1.226144  |
| 13            | 1             | 0           | 1.058890                | 2.110703  | -0.383396 |
| 14            | 8             | 0           | 1.855277                | -0.194604 | -0.434487 |
| 15            | 6             | 0           | 2.876516                | -0.605616 | 0.462854  |
| 16            | 1             | 0           | 3.796983                | -0.109604 | 0.147515  |
| 17            | 1             | 0           | 2.644454                | -0.322433 | 1.499108  |
| 18            | 1             | 0           | 3.026371                | -1.694203 | 0.424569  |

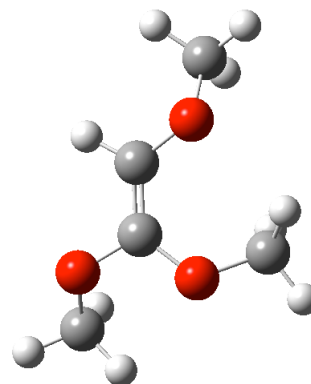**2g (protonated)**

SCF Done: E(RB+HF-LYP) = -422.698326045 A.U. after 7 cycles

| Center Number | Atomic Number | Atomic Type | Coordinates (Angstroms) |           |           |
|---------------|---------------|-------------|-------------------------|-----------|-----------|
|               |               |             | X                       | Y         | Z         |
| 1             | 6             | 0           | -0.588808               | -0.201177 | 0.096984  |
| 2             | 6             | 0           | 0.764670                | -0.806126 | 0.380787  |
| 3             | 8             | 0           | -1.555565               | -1.038495 | 0.025318  |
| 4             | 6             | 0           | -2.943576               | -0.581390 | -0.171526 |
| 5             | 1             | 0           | -3.214743               | 0.091965  | 0.641124  |
| 6             | 1             | 0           | -3.014005               | -0.082892 | -1.137820 |
| 7             | 1             | 0           | -3.528731               | -1.496319 | -0.148627 |
| 8             | 1             | 0           | 0.716494                | -1.862174 | 0.078814  |
| 9             | 8             | 0           | -0.856506               | 1.039468  | -0.043693 |
| 10            | 6             | 0           | 0.113860                | 2.151230  | 0.091415  |
| 11            | 1             | 0           | -0.522042               | 3.026500  | 0.196559  |
| 12            | 1             | 0           | 0.731263                | 1.991519  | 0.972178  |
| 13            | 1             | 0           | 0.715059                | 2.184764  | -0.812829 |
| 14            | 8             | 0           | 1.736416                | -0.074059 | -0.299999 |
| 15            | 6             | 0           | 3.059021                | -0.609510 | -0.133530 |
| 16            | 1             | 0           | 3.721975                | 0.034559  | -0.709839 |
| 17            | 1             | 0           | 3.356735                | -0.597091 | 0.922112  |
| 18            | 1             | 0           | 3.114987                | -1.633697 | -0.520294 |
| 19            | 1             | 0           | 0.897253                | -0.790609 | 1.480828  |

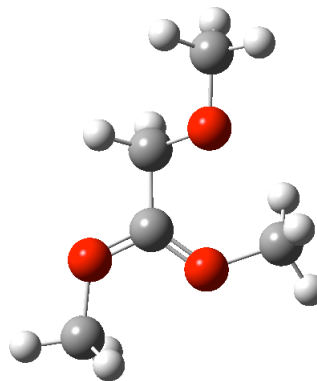

### 3. Synthesis of mPEG-Vinyl Ether Lipids

#### 3a. Synthesis route for MeO-PEG-1'-oxyethene-1'-O-1,2-dioleoylglycerol (ST912 & 915).

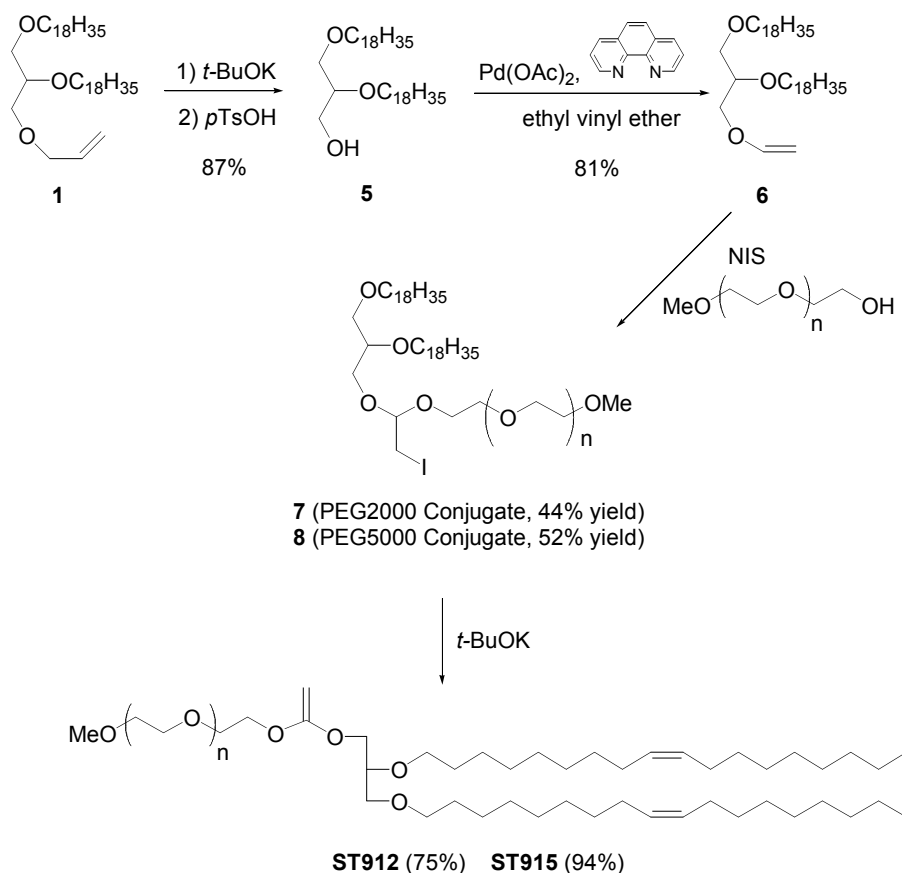

#### 3b. Synthesis route for MeO-PEG-1'-oxy-1'-propene-1'-O-1,2-dioleoylglycerol (ST902 & 905).

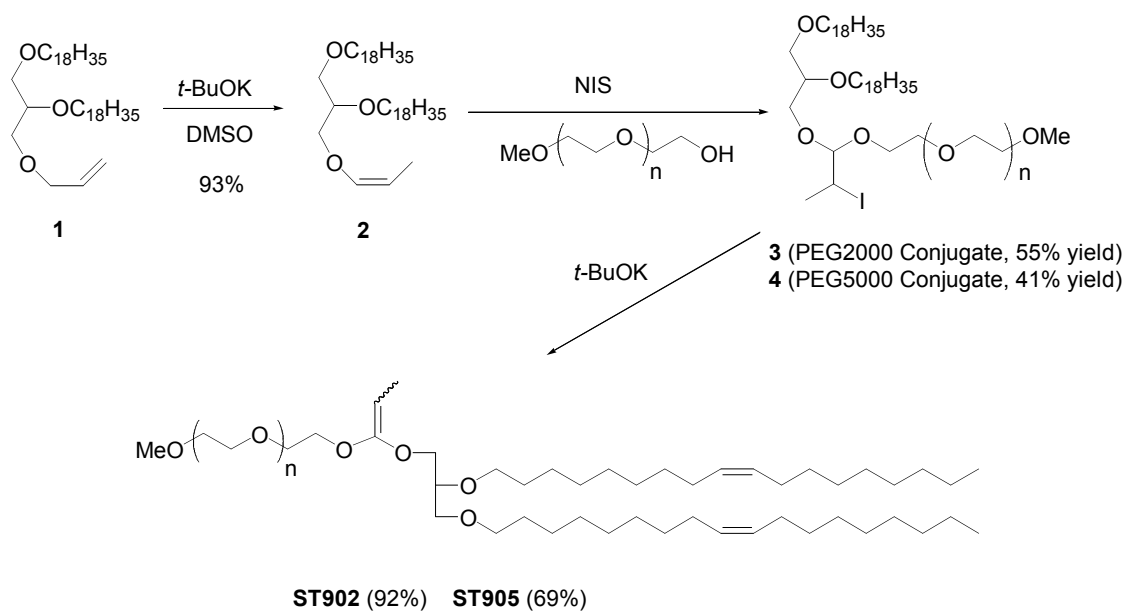

### 3c. Synthesis route for MeO-PEG-1'-oxy-2'-propene-2'-O-1,2-dioleoylglycerol (ST502 & 505).

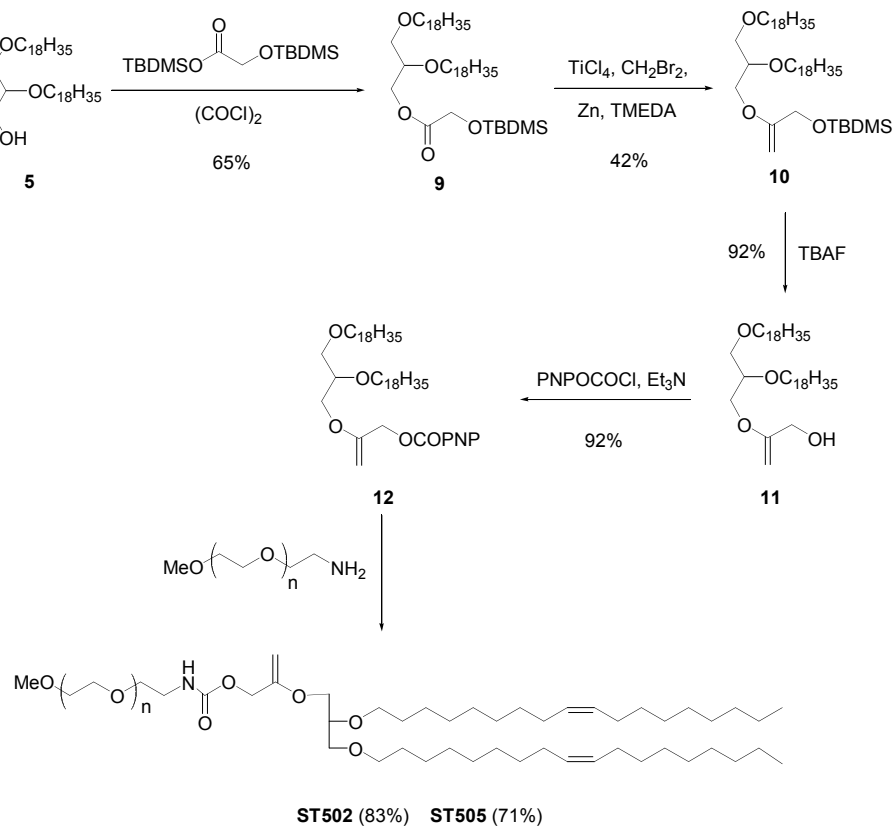

### 3d. Synthesis route for MeO-PEG-1'-amido-2'-propene-2'-O-1,2-dioleoylglycerol (ST152 & 155).

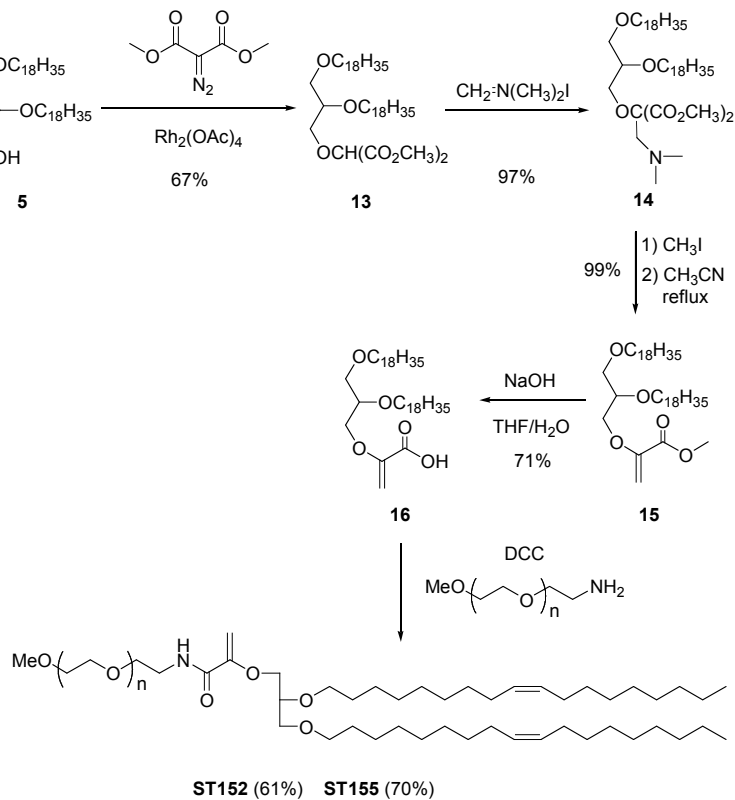

#### 4. Detailed Description of MeO-PEG-VE-DOG Lipid Syntheses

**1-(1',2'-Di-O-oleyl-*rac*-glyceryloxy)propene (2).** *t*-BuOK (552 mg, 4.92 mmol) was added to a flask containing **1** (3.114 g, 4.92 mmol) in DMSO (50 mL). The mixture was stirred at 100 °C for 3 h and then diluted with diethyl ether (200 mL) before washing with water (2 x 50 mL). Silica gel column chromatographic purification (10:1 hexane:Et<sub>2</sub>O as eluent) of the organic residue gave **2** as an oil (2.881 g, 4.55 mmol, 93% yield). <sup>1</sup>H NMR (CDCl<sub>3</sub>): δ 0.86 (t, 6H), 1.26 (m, 44H), 1.54 (m, 7H), 1.98 (m, 8H), 3.39-3.85 (m, 9H), 4.35 (quintet, 1H, J = 6 Hz), 5.32 (m, 4H), 5.94 (d, 1H, J = 6 Hz); <sup>13</sup>C NMR (CDCl<sub>3</sub>): δ 9.4, 14.3, 22.9, 26.3, 26.4, 27.5, 29.4, 29.5, 29.6, 29.7, 29.8, 29.9, 30.0, 30.3, 32.2, 32.8, 70.5, 71.0, 71.9, 72.4, 78.0, 101.1, 130.1, 130.2, 146.3; CI (M + H)<sup>+</sup> calc'd 633, found 633.

##### **1-(1',2'-Di-O-oleyl-*rac*-glyceryloxy)-1-(ω-methoxy-polyethylene**

**glycol[2000]oxy)-2-iodopropane (3).** N-Iodosuccinimide (246 mg, 1.10 mmol) was added to a flask containing **2** (750 mg, 1.18 mmol) and mPEG2000 (1.82 g, 0.911 mmol) in CH<sub>2</sub>Cl<sub>2</sub> (20 mL) at 0 °C and the mixture stirred at 23 °C for 3 h. The reaction mixture then was directly loaded onto a silica gel column and purified via step gradient elution with 20:1, then 10:1 CH<sub>2</sub>Cl<sub>2</sub>:MeOH to give **3** (1.385 g, 5.02 mmol, 55%). <sup>1</sup>H NMR (CDCl<sub>3</sub>): δ 0.85 (t, 6H, J = 6 Hz), 1.25 (m, 44H), 1.52 (m, 4H), 1.83 (d, 3H, J = 7 Hz), 1.98 (m, 8H), 3.3-3.9 (m, ca. 200H), 4.16 (m, 1H), 4.45 (m, 1H), 5.32 (m, 4H).

##### **1-(1',2'-Di-O-oleyl-*rac*-glyceryloxy)-1-(ω-methoxy-polyethylene**

**glycol[5000]oxy)-2-iodopropane (4).** Compound **4** was prepared as described above in 41% yield using mPEG5000. <sup>1</sup>H NMR (CDCl<sub>3</sub>): δ 0.85 (t, 6H, J = 6 Hz), 1.25 (m, 44H), 1.52 (m, 4H), 1.83 (d, 3H, J = 7 Hz), 1.98 (m, 8H), 3.3-3.9 (m, ca. 500H), 4.16 (m, 1H), 4.45 (m, 1H), 5.32 (m, 4H).

**ST902.** *t*-BuOK (117 mg, 1.04 mmol) was added to 30 mL of THF containing **3** (1.308g, 0.474 mmol) and the mixture stirred at 23 °C for 4 h. The reaction mixture then was diluted with CH<sub>2</sub>Cl<sub>2</sub> (50 mL) and washed with 0.05 M of Na<sub>2</sub>CO<sub>3</sub> solution (10 mL). The organic layer was dried over anhydrous

Na<sub>2</sub>CO<sub>3</sub> and concentrated to give a solid. The resulting solid was dissolved in benzene and lyophilized to give **ST902** (1.148 g, 0.436 mmol, 92%). <sup>1</sup>H NMR (CDCl<sub>3</sub>): δ 0.85 (t, 6H, J = 6 Hz), 1.25 (m, 44H), 1.51 (d, 3H, J = 7 Hz), 1.52 (m, 4H), 1.98 (m, 8H), 3.3-4.0 (m, ca. 200H), 5.32 (m, 4H).

**ST905.** **ST905** was prepared from **4** in 69% yield as described above for **ST902**. <sup>1</sup>H NMR (CDCl<sub>3</sub>): δ 0.85 (t, 6H, J = 6 Hz), 1.25 (m, 44H), 1.51 (d, 3H, J = 7 Hz), 1.52 (m, 4H), 1.98 (m, 8H), 3.3-4.0 (m, ca. 500H), 5.32 (m, 4H).

**1,2-Di-O-oleyl-rac-glycerol (5).** t-BuOK (1.514 g, 13.5 mmol) was added to a flask containing **1** (8.541 g, 13.5 mmol) in DMSO (100 mL). The mixture was stirred at 100 °C overnight, then diluted with hexane (300 mL) and washed with water (100 mL). The organic layer was dried over anhydrous MgSO<sub>4</sub>, concentrated under reduced pressure, and the resulting residue dissolved in a mixed solvent of MeOH:CH<sub>2</sub>Cl<sub>2</sub> (50 mL:20 mL). p-TsOH (300 mg, 1.58 mmol) was added and the mixture stirred at 23 °C for 1 h before concentrating it to 20 mL and then adding 200 mL CH<sub>2</sub>Cl<sub>2</sub>. The organic solution was washed with 0.05 M Na<sub>2</sub>CO<sub>3</sub> solution (100 mL) and water (100 mL). Silica gel column chromatographic purification (2:1 hexane:Et<sub>2</sub>O as eluent) of the organic residue gave **5** as an oil (6.952 g, 11.7 mmol, 87% yield). <sup>1</sup>H NMR (CDCl<sub>3</sub>): δ 0.86 (t, 6H), 1.26 (m, 44H), 1.54 (m, 4H), 1.98 (m, 8H), 2.1 (s, 1H), 3.39-3.71 (m, 9H), 5.32 (m, 4H); <sup>13</sup>C NMR (CDCl<sub>3</sub>): δ 14.3, 22.9, 26.3, 27.4, 29.5, 29.6, 29.7, 29.8, 29.9, 30.0, 30.3, 32.2, 32.8, 63.3, 70.6, 71.2, 72.1, 78.5, 130.1, 130.2; Cl (M + H)<sup>+</sup> calc'd 593, found 593.

**1-(1',2'-Di-O-oleyl-rac-glyceroyloxy)ethene (6).** Pd(OAc)<sub>2</sub> (217 mg, 0.97 mmol) and 1,10-phenanthroline (174 mg, 0.97 mmol) were added to a dry 100 mL Schlenk flask containing **5** (5.743 g, 9.68 mmol) in a mixture of ethyl vinyl ether (30 mL) and CH<sub>2</sub>Cl<sub>2</sub> (15 mL) under an atmosphere of Ar. The mixture was stirred at 70 °C for 20 h, prior to cooling to 0 °C and exposure to air. The mixture was filtered using a short alumina column and the filtrate concentrated. Silica gel column chromatographic purification (8:1 hexane:Et<sub>2</sub>O as eluent) gave **6** as an oil (4.826 g, 8.80 mmol, 81%

yield) and recovered starting material **5** (1.098 g, 1.85 mmol, 19%).  $^1\text{H}$  NMR ( $\text{CDCl}_3$ ):  $\delta$  0.86 (t, 6H), 1.26 (m, 44H), 1.54 (m, 4H), 1.98 (m, 8H), 3.39-3.81 (m, 9H), 3.97 (dd, 1H,  $J=2, 7$  Hz), 4.17 (dd, 1H,  $J=2, 14$  Hz), 5.32 (m, 4H), 6.45 (dd, 1H,  $J=7, 14$  Hz);  $^{13}\text{C}$  NMR ( $\text{CDCl}_3$ ):  $\delta$  14.3, 22.9, 26.3, 26.4, 27.4, 29.4, 29.5, 29.6, 29.7, 29.8, 29.9, 30.0, 30.3, 32.2, 32.8, 68.3, 70.5, 70.9, 71.9, 77.0, 86.7, 130.0, 130.1, 152.2; CI ( $\text{M} + \text{H}$ ) $^+$  calc'd 619, found 619.

**1-(1',2'-Di-O-oleyl-*rac*-glyceryloxy)-1-( $\omega$ -methoxy-polyethylene**

**glycol[2000]oxy)-2-iodoethane (7).** Compound **7** was prepared in 44% yield starting from **6** and mPEG2000 using the same procedure described for the synthesis of **3**.  $^1\text{H}$  NMR ( $\text{CDCl}_3$ ):  $\delta$  0.85 (t, 6H,  $J=6$  Hz), 1.25 (m, 44H), 1.51 (m, 4H), 1.97 (m, 8H), 3.21 (d, 2H,  $J=5$  Hz), 3.3-3.9 (m, ca. 200H), 4.68 (m, 1H), 5.32 (m, 4H).

**1-(1',2'-Di-O-oleyl-*rac*-glyceryloxy)-1-( $\omega$ -methoxy-polyethylene**

**glycol[5000]oxy)-2-iodoethane (8).** Compound **8** was prepared in 52% yield starting from **6** and mPEG5000 using same procedure described for the synthesis of **3**.  $^1\text{H}$  NMR ( $\text{CDCl}_3$ ):  $\delta$  0.85 (t, 6H,  $J=6$  Hz), 1.25 (m, 44H), 1.51 (m, 4H), 1.97 (m, 8H), 3.21 (d, 2H,  $J=5$  Hz), 3.3-3.9 (m, ca. 500H), 4.68 (m, 1H), 5.32 (m, 4H).

**ST912.** **ST912** was prepared in 75% yield starting from **7** using the same procedure described for the synthesis of **ST902**.  $^1\text{H}$  NMR ( $\text{CDCl}_3$ ):  $\delta$  0.84 (t, 6H,  $J=6$  Hz), 1.24 (m, 44H), 1.51 (m, 4H), 1.97 (m, 8H), 3.12 (s, 2H), 3.3-3.9 (m, ca. 200H), 5.32 (m, 4H).

**ST915.** **ST915** was prepared in 94% yield starting from **8** using the same procedure described for the synthesis of **ST902**.  $^1\text{H}$  NMR ( $\text{CDCl}_3$ ):  $\delta$  0.84 (t, 6H,  $J=6$  Hz), 1.24 (m, 44H), 1.51 (m, 4H), 1.97 (m, 8H), 3.12 (s, 2H), 3.3-3.9 (m, ca. 500H), 5.32 (m, 4H).

**1,2-Dioleyl-*rac*-3-(2'-*t*-butyldimethylsilyloxy)acetate (9).** Oxalyl chloride (1.02 mL, 11.7 mmol) was added to a flask containing bis(*t*-butyldimethylsilyloxy)glycolate (2.965g, 9.74 mmol) and 2

drops of DMF in CH<sub>2</sub>Cl<sub>2</sub> (15 mL) at 0 °C. The mixture was stirred at 0 °C for 10 min and then at 23 °C for 2 h before concentrating the reaction mixture under reduced pressure and then dissolving the resulting residue with CH<sub>2</sub>Cl<sub>2</sub> (20 mL). Compound **5** (4.813 g, 8.12 mmol) in pyridine was added at 0 °C and the reaction mixture stirred at 23 °C for 2 h. The mixture then was diluted with CH<sub>2</sub>Cl<sub>2</sub> (50 mL) and washed with water (50 mL). Silica gel column chromatographic purification (8:1 hexane:Et<sub>2</sub>O as eluent) of the organic residue gave **9** as an oil (4.021 g, 5.25 mmol, 65% yield). <sup>1</sup>H NMR (CDCl<sub>3</sub>): δ 0.08 (s, 6H), 0.87 (m, 15H), 1.24 (m, 44H), 1.53 (m, 4H), 1.98 (m, 8H), 3.38-3.62 (m, 7H), 4.10-4.30 (m, 4H), 5.32 (m, 4H); <sup>13</sup>C NMR (CDCl<sub>3</sub>): δ -5.2, 14.3, 18.6, 22.9, 26.0, 26.3, 27.4, 29.2, 29.3, 29.4, 29.5, 29.6, 29.7, 29.8, 29.9, 30.0, 30.3, 32.2, 32.8, 61.9, 64.5, 70.4, 70.9, 72.0, 76.7, 130.0, 130.1, 171.8; ESI (M + H)<sup>+</sup> calc'd 765, found 765.

**1,2-Di-O-oleyl-rac-glyceryloxy-3-(1'-t-butyldimethylsilyloxy-2'-propene) (10).** TiCl<sub>4</sub> (2.14 mL, 19.5 mmol) was slowly added to THF (100 mL) at 0 °C and the solution became yellow. TMEDA (5.9 mL, 39 mmol) was added at 0 °C and the yellow solution became brown. Zn (2.868 mg, 43.8 mmol) containing 3% Pb was added and the solution stirred at 23 °C for 30 min (the brown solution became green). A mixture of **9** (3.731 g, 4.875 mmol) and CH<sub>2</sub>Br<sub>2</sub> in THF (10 mL) was added at 0 °C and the mixture stirred at 23 °C for 1 d. Saturated K<sub>2</sub>CO<sub>3</sub> (10 mL) was added at 0 °C and the mixture stirred at 0 °C for 15 min before filtering the reaction mixture to remove the hydroxy metalate salts and concentrating the filtrate under reduced pressure. Alumina column chromatographic purification (2:1 hexane:CH<sub>2</sub>Cl<sub>2</sub> as eluent) of the organic residue gave **10** as an oil (1.543 g, 2.02 mmol, 42% yield). <sup>1</sup>H NMR (C<sub>6</sub>D<sub>6</sub>): δ 0.04 (s, 6H), 0.87 (m, 15H), 1.24 (m, 44H), 1.55 (m, 4H), 2.06 (m, 8H), 3.33 (t, 2H, J = 7 Hz), 3.49-3.56 (m, 4H), 3.72-3.89 (m, 3H), 4.08 (s, 1H), 4.12 (s, 2H), 4.40 (s, 1H), 5.46 (m, 4H); <sup>13</sup>C NMR (C<sub>6</sub>D<sub>6</sub>): δ -5.2, 14.3, 18.5, 23.1, 26.1, 26.6, 27.7, 29.6, 29.7, 29.8, 29.9, 30.0, 30.1, 30.2, 30.7, 32.3, 33.1, 63.6, 68.2, 70.8, 71.3, 71.8, 77.6, 81.2, 130.2, 162.4; ESI (M + H)<sup>+</sup> calc'd 763, found 763.

**1,2-Di-O-oleyl-*rac*-glyceryloxy-2'-propen-1'-ol (11).** TBAF (3.0 mL, 1.0 M in THF) was added to a flask containing **10** (763 mg, 1.00 mmol) in THF (10 mL). The mixture was stirred at 23 °C for 2 h and filtered using a short alumina column (Et<sub>2</sub>O eluent). The solution was concentrated and the residue purified via silica gel column chromatography (1:1 hexane:Et<sub>2</sub>O as eluent) to give **11** as an oil (594 mg, 0.92 mmol, 92% yield). <sup>1</sup>H NMR (CDCl<sub>3</sub>): δ 0.85 (t, 6H, J = 7 Hz), 1.25 (m, 44H), 1.52 (m, 4H), 1.98 (m, 8H), 2.17 (s, 1H), 3.41 (t, 2H, J = 7 Hz), 3.49 (d, 2H, J = 7 Hz), 3.55 (t, 2H, J = 7 Hz), 3.65-3.83 (m, 3H), 4.01 (m, 3H), 4.14 (s, 1H), 5.32 (m, 4H); <sup>13</sup>C NMR (CDCl<sub>3</sub>): δ 14.1, 22.6, 26.0, 26.1, 27.2, 29.1, 29.2, 29.3, 29.4, 29.5, 29.6, 29.7, 29.8, 29.9, 30.0, 31.9, 32.6, 63.6, 67.6, 70.4, 70.7, 71.7, 76.8, 82.3, 129.8, 129.9, 161.3; Cl (M + H)<sup>+</sup> calc'd 649, found 649.

**1,2-Di-O-oleyl-*rac*-glyceryl-3-(2'-propenyl-1'-(4''-nitrophenyl)carbonate) (12).** Triethylamine (413 mg, 4.1 mmol) was added to **11** (531 mg, 0.818 mmol) in THF (5 mL). 4-Nitrophenyl chloroformate (247 mg, 1.23 mmol) was added and the mixture stirred for 1 h. The reaction mixture was concentrated and the resulting residue purified by silica gel column chromatography (4:1 hexane:Et<sub>2</sub>O as eluent) to give **12** as an oil (612 mg, 0.752 mmol, 92% yield). <sup>1</sup>H NMR (CDCl<sub>3</sub>): δ 0.86 (t, 6H, J = 6 Hz), 1.24 (m, 44H), 1.53 (m, 4H), 1.97 (m, 8H), 3.43 (t, 2H, J = 7 Hz), 3.49 (d, 2H, J = 7 Hz), 3.56 (t, 2H, J = 7 Hz), 3.68-3.88 (m, 3H), 4.21 (d, 1H, J = 3 Hz), 4.30 (d, 1H, J = 3 Hz), 4.67 (s, 2H), 5.31 (m, 4H), 7.37 (d, 2H, J = 9 Hz), 8.24 (d, 2H, J = 9 Hz); <sup>13</sup>C NMR (CDCl<sub>3</sub>): δ 14.0, 22.6, 26.0, 27.2, 29.1, 29.2, 29.3, 29.4, 29.5, 29.6, 29.7, 30.0, 31.9, 32.5, 68.0, 68.9, 70.2, 70.8, 71.7, 76.7, 86.3, 121.7, 125.2, 129.7, 129.9, 145.4, 152.2, 155.5, 155.8; ESI calc'd (M + Na)<sup>+</sup> 836, found 836.

**ST502.** Triethylamine (230 mg, 2.3 mmol), **12** (380 mg, 0.467 mmol), and mPEGamine2000 (623 mg, 0.311 mmol) were combined in DMF (10 mL) and stirred at 23 °C for 12 h. The reaction mixture was concentrated and purified by silica gel column chromatography (10:1 CH<sub>2</sub>Cl<sub>2</sub>:MeOH as eluent) to give **ST502** (692 mg, 0.258 mmol, 83% yield). <sup>1</sup>H NMR (CDCl<sub>3</sub>): δ 0.80 (t, 6H, J = 6 Hz), 1.20



(m, 44H), 1.48 (m, 4H), 1.93 (m, 8H), 3.2-3.8 (m, ca. 200H), 4.02 (d, 1H, J = 2 Hz), 4.10 (d, 1H, J = 2 Hz), 4.41 (s, 2H), 5.31 (m, 5H).

**ST505.** **ST505** was prepared as described above in 71% yield using mPEGamine5000.  $^1\text{H}$  NMR ( $\text{CDCl}_3$ ):  $\delta$  0.82 (t, 6H, J = 6 Hz), 1.23 (m, 44H), 1.50 (m, 4H), 1.95 (m, 8H), 3.2-3.8 (m, ca. 500H), 4.05 (d, 1H, J = 2 Hz), 4.13 (d, 1H, J = 2 Hz), 4.43 (s, 2H), 5.34 (m, 5H).

**Dimethyl 2-(1',2'-di-O-oleyl-*rac*-glyceryloxy)malonate (13).**  $\text{Rh}_2(\text{OAc})_4$  (17 mg, 0.038 mmol) was added to a flask containing **5** (2.234 g, 3.77 mmol) and dimethyl diazomalonate in benzene (50 mL). The mixture was heated at reflux for 3 h before cooling, concentrating the reaction mixture, and purifying the residue by silica gel column chromatography (1:1 hexane:Et<sub>2</sub>O as eluent) to give **13** as an oil (1.832 g, 2.53 mmol, 67% yield).  $^1\text{H}$  NMR ( $\text{CDCl}_3$ ):  $\delta$  0.85 (t, 6H, J = 7 Hz), 1.24 (m, 44H), 1.51 (m, 4H), 1.97 (m, 8H), 3.4-3.8 (m, 9H), 3.78 (s, 6H), 4.65 (s, 1H), 5.31 (m, 4H);  $^{13}\text{C}$  NMR ( $\text{CDCl}_3$ ):  $\delta$  14.0, 22.6, 26.0, 26.1, 27.2, 29.1, 29.2, 29.3, 29.4, 29.5, 29.6, 29.7, 29.8, 29.9, 30.0, 31.5, 31.9, 32.6, 52.7, 70.0, 70.6, 71.5, 71.7, 77.9, 79.5, 129.8, 129.9, 166.9; ESI ( $\text{M} + \text{H}$ )<sup>+</sup> calc'd 723, found 723.

**Dimethyl 2-(1',2'-di-O-oleyl-*rac*-glyceryloxy)-2-dimethylaminomethyl malonate (14).** Eschenmoser's salt (1.454 g, 7.86 mmol) was added to a flask containing **13** (2.841 g, 3.93 mmol) and triethylamine (1.1 mL, 7.86 mmol) in  $\text{CH}_2\text{Cl}_2$  (50 mL). The mixture was stirred at 23 °C for 12 h before washing the reaction mixture with water (2 x 20 mL) and concentration under reduced pressure. The resulting residue was purified by silica gel column chromatography (1:1 hexane:Et<sub>2</sub>O as eluent) to give **14** as an oil (2.970 g, 3.81 mmol, 97% yield).  $^1\text{H}$  NMR ( $\text{CDCl}_3$ ):  $\delta$  0.86 (t, 6H, J = 7 Hz), 1.25 (m, 44H), 1.52 (m, 4H), 1.98 (m, 8H), 2.28 (s, 6H), 2.91 (s, 2H), 3.35-3.65 (m, 9H), 3.75 (s, 6H), 5.32 (m, 4H);  $^{13}\text{C}$  NMR ( $\text{CDCl}_3$ ):  $\delta$  14.0, 22.6, 26.0, 26.1, 27.2, 29.1, 29.2, 29.3, 29.4, 29.5, 29.6, 29.7, 30.0, 31.9, 32.5, 47.2, 52.3, 62.1, 66.7, 70.6, 70.9, 71.5, 77.7, 86.5, 129.8, 129.9, 168.3; ESI ( $\text{M} + \text{H}$ )<sup>+</sup> calc'd 780, found 780.

**Methyl 2-(1',2'-di-O-oleyl-*rac*-glyceryloxy)acrylate (15).** MeI (1.36 mL, 21.8 mmol) was added to a flask containing **14** (3.01 g, 3.86 mmol) in CH<sub>2</sub>Cl<sub>2</sub> (50 mL). The mixture was heated at reflux for 12 h before cooling, concentration under reduced pressure and addition of CH<sub>3</sub>CN (50 mL). Then, the reaction mixture was heated at reflux for 1 d before concentration under reduced pressure, and purification of the organic residue by silica gel column chromatography (1:1 hexane:Et<sub>2</sub>O as eluent) to give **15** as an oil (2.012 g, 2.97 mmol, 99% yield). <sup>1</sup>H NMR (CDCl<sub>3</sub>): δ 0.85 (t, 6H), 1.24 (m, 44H), 1.52 (m, 4H), 1.98 (m, 8H), 3.35-3.90 (m, 12H), 4.62 (d, 1H, J = 2 Hz), 5.32 (m, 5H); <sup>13</sup>C NMR (CDCl<sub>3</sub>): δ 14.0, 22.6, 26.0, 27.1, 29.1, 29.2, 29.3, 29.4, 29.5, 29.6, 29.7, 30.0, 31.8, 32.5, 52.1, 68.8, 70.2, 70.9, 71.7, 76.5, 94.3, 129.8, 129.9, 151.2, 163.4; ESI (M + H)<sup>+</sup> calc'd 677, found 677.

**2-(1',2'-Di-O-oleyl-*rac*-glyceryloxy)acrylic acid (16).** NaOH solution (2.5 mL at 2.0 M) was added to a flask containing **15** (1.107 g, 1.635 mmol) in a mixed solvent of THF (20 mL) and H<sub>2</sub>O (10 mL). The reaction mixture was heated at reflux for 3 h and concentrated under reduced pressure. H<sub>2</sub>O (20 mL) and Et<sub>2</sub>O (20 mL) were added and the pH of the aqueous layer was adjusted to around 4 by slow addition of 1.0 M HCl. The organic layer was concentrated and the resulting residue purified by silica gel column chromatography (Et<sub>2</sub>O as eluent) to give **16** as an oil (770 mg, 1.16 mmol, 71% yield). <sup>1</sup>H NMR (CDCl<sub>3</sub>): δ 0.85 (t, 6H, J = 7 Hz), 1.25 (m, 44H), 1.54 (m, 4H), 1.98 (m, 8H), 3.35-3.90 (m, 9H), 4.71 (d, 1H, J = 2 Hz), 5.31 (m, 4H), 5.46 (d, 1H, J = 2 Hz); <sup>13</sup>C NMR (CDCl<sub>3</sub>): δ 14.0, 22.6, 26.0, 26.1, 27.2, 29.1, 29.2, 29.3, 29.4, 29.5, 29.6, 29.7, 30.0, 31.9, 32.5, 69.0, 70.0, 70.9, 71.8, 76.4, 76.0, 129.8, 129.9, 150.4, 166.2; ESI (M + H)<sup>+</sup> calc'd 663, found 663.

**ST152.** DCC (115 mg, 0.558 mmol), **16** (493 mg, 0.744 mmol), mPEGamine2000 (743 mg, 0.372 mmol), and DMAP (2 mg) were combined in CH<sub>2</sub>Cl<sub>2</sub> (30 mL) and stirred at 23 °C for 12 h. The reaction mixture was filtered to remove the urea byproduct, the filtrate concentrated under reduced pressure, and the organic residue purified by silica gel column chromatography (10:1 CH<sub>2</sub>Cl<sub>2</sub>:MeOH as

eluent) to give **ST152** (603 mg, 0.227 mmol, 61% yield).  $^1\text{H}$  NMR ( $\text{CDCl}_3$ ):  $\delta$  0.86 (t, 6H,  $J = 6$  Hz), 1.25 (m, 44H), 1.54 (m, 4H), 1.98 (m, 8H), 3.3-3.9 (m, ca. 200H), 4.44 (d, 1H,  $J = 2$  Hz), 5.32 (m, 4H), 5.37 (d, 1H,  $J = 2$  Hz), 6.94 (t, 1H,  $J = 5$  Hz).

**ST155.** **ST155** was prepared as described above in 70% yield using mPEGamine5000.  $^1\text{H}$  NMR ( $\text{CDCl}_3$ ):  $\delta$  0.86 (t, 6H,  $J = 6$  Hz), 1.25 (m, 44H), 1.54 (m, 4H), 1.98 (m, 8H), 3.3-3.9 (m, ca. 500H), 4.44 (d, 1H,  $J = 2$  Hz), 5.32 (m, 4H), 5.37 (d, 1H,  $J = 2$  Hz), 6.94 (t, 1H,  $J = 5$  Hz).

## 5. Hydrolysis Studies by TLC

### TLC Analysis of mPEG2000-VE-Lipid Hydrolysis

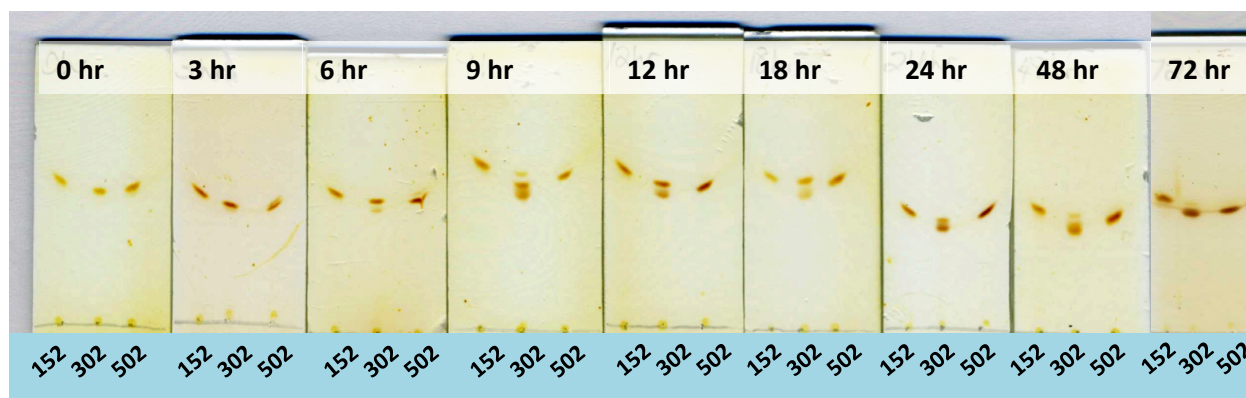

### TLC Analysis of mPEG5000-VE-Lipid Hydrolysis

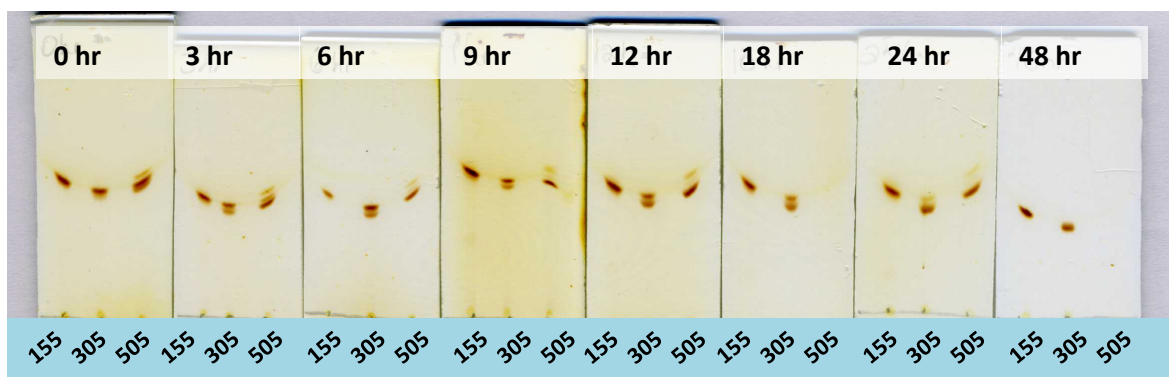

## 6. Hydrolysis Studies by HPLC-CAD

### Figure S6. HPLC Analysis of ST912 Hydrolysis

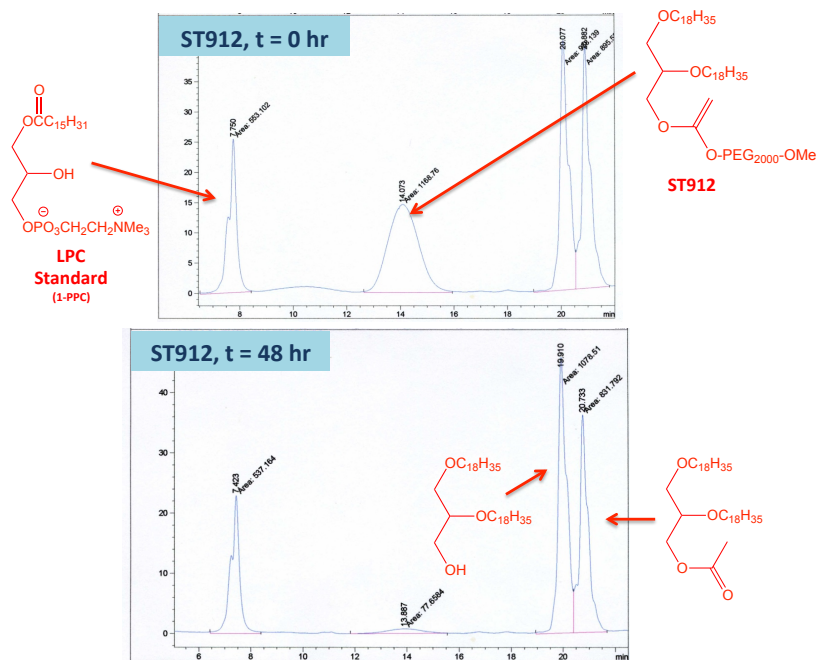

### Figure S7. HPLC Analysis of ST502 Hydrolysis

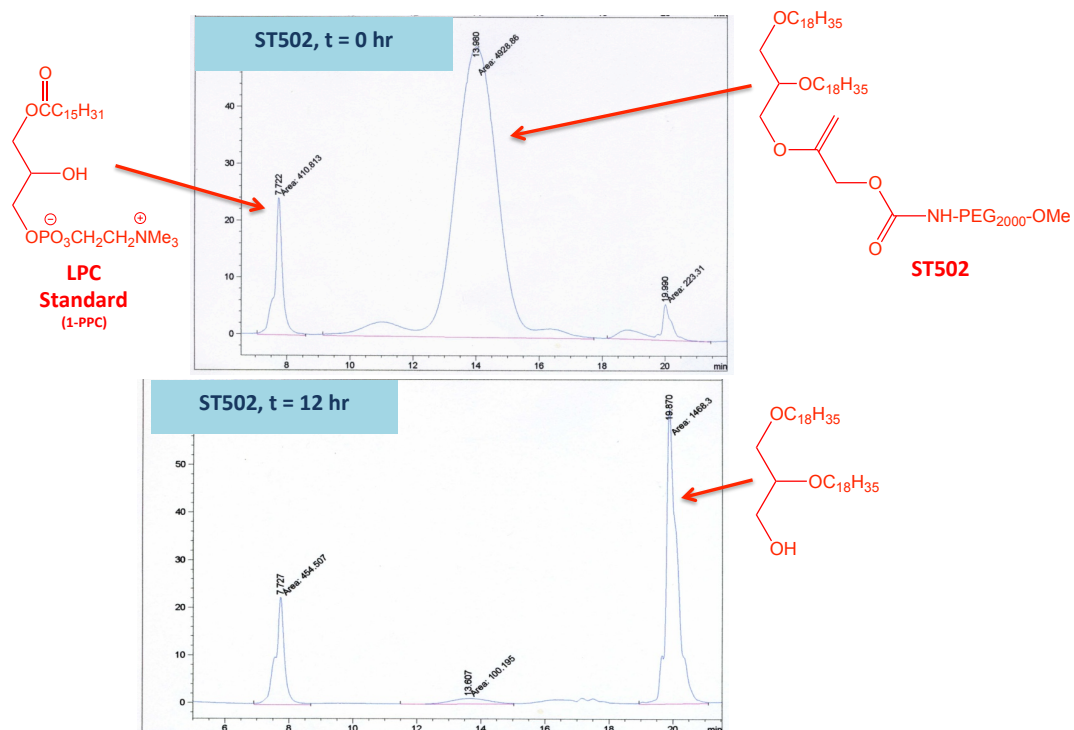



Figure S10. Table of Intrinsic Second Order Rate Constants and Proton Affinities Calculated by DFT

| mPEG-VE-Lipid | Pseudo-First Order Rate Constant (s <sup>-1</sup> ) | Intrinsic Second Order Rate Constant (M <sup>-1</sup> *s <sup>-1</sup> ) | log k (M <sup>-1</sup> s <sup>-1</sup> ) |
|---------------|-----------------------------------------------------|--------------------------------------------------------------------------|------------------------------------------|
| ST912         | $5.2 \times 10^7$                                   | $5.2 \times 10^4$                                                        | 4.71                                     |
| ST502         | $7.3 \times 10^{-1}$                                | 730                                                                      | 2.86                                     |
| ST505         | $2.4 \times 10^{-1}$                                | 240                                                                      | 2.38                                     |
| ST302         | $1.4 \times 10^{-5}$                                | $1.4 \times 10^{-2}$                                                     | -1.85                                    |
| ST305         | $8.3 \times 10^{-6}$                                | $8.3 \times 10^{-3}$                                                     | -2.08                                    |
| ST152         | $5 \times 10^{-9}$                                  | $5 \times 10^{-6}$                                                       | -5.30                                    |
| ST155         | $2.5 \times 10^{-8}$                                | $2.5 \times 10^{-5}$                                                     | -4.60                                    |

Figure S11. <sup>1</sup>H NMR of ST912 and ST902 hydrolysis proceeding in d<sub>6</sub>-benzene with <5% water added (pH 7).

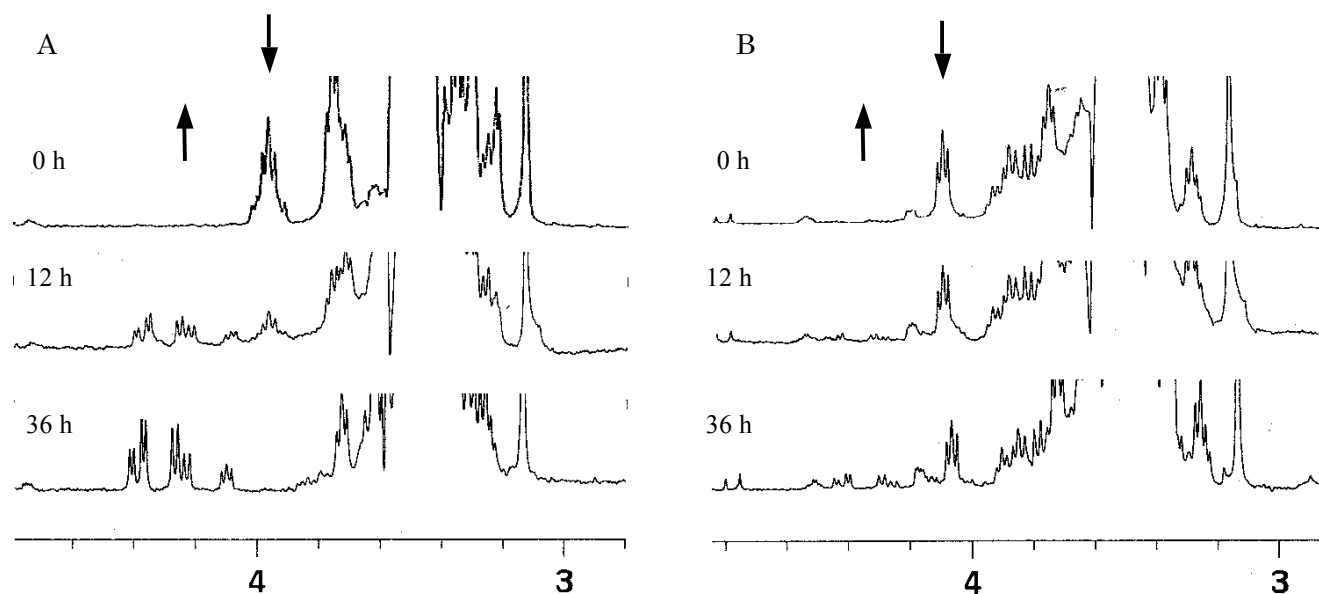

## 7. Calcein Release Rates for Various mPEG-VE-lipid Loadings in DOPE Liposomes

**Figure S12.** Release rates from DOPE:ST152, DOPE:ST155 and DOPE:ST305 liposomes as a function of pH.

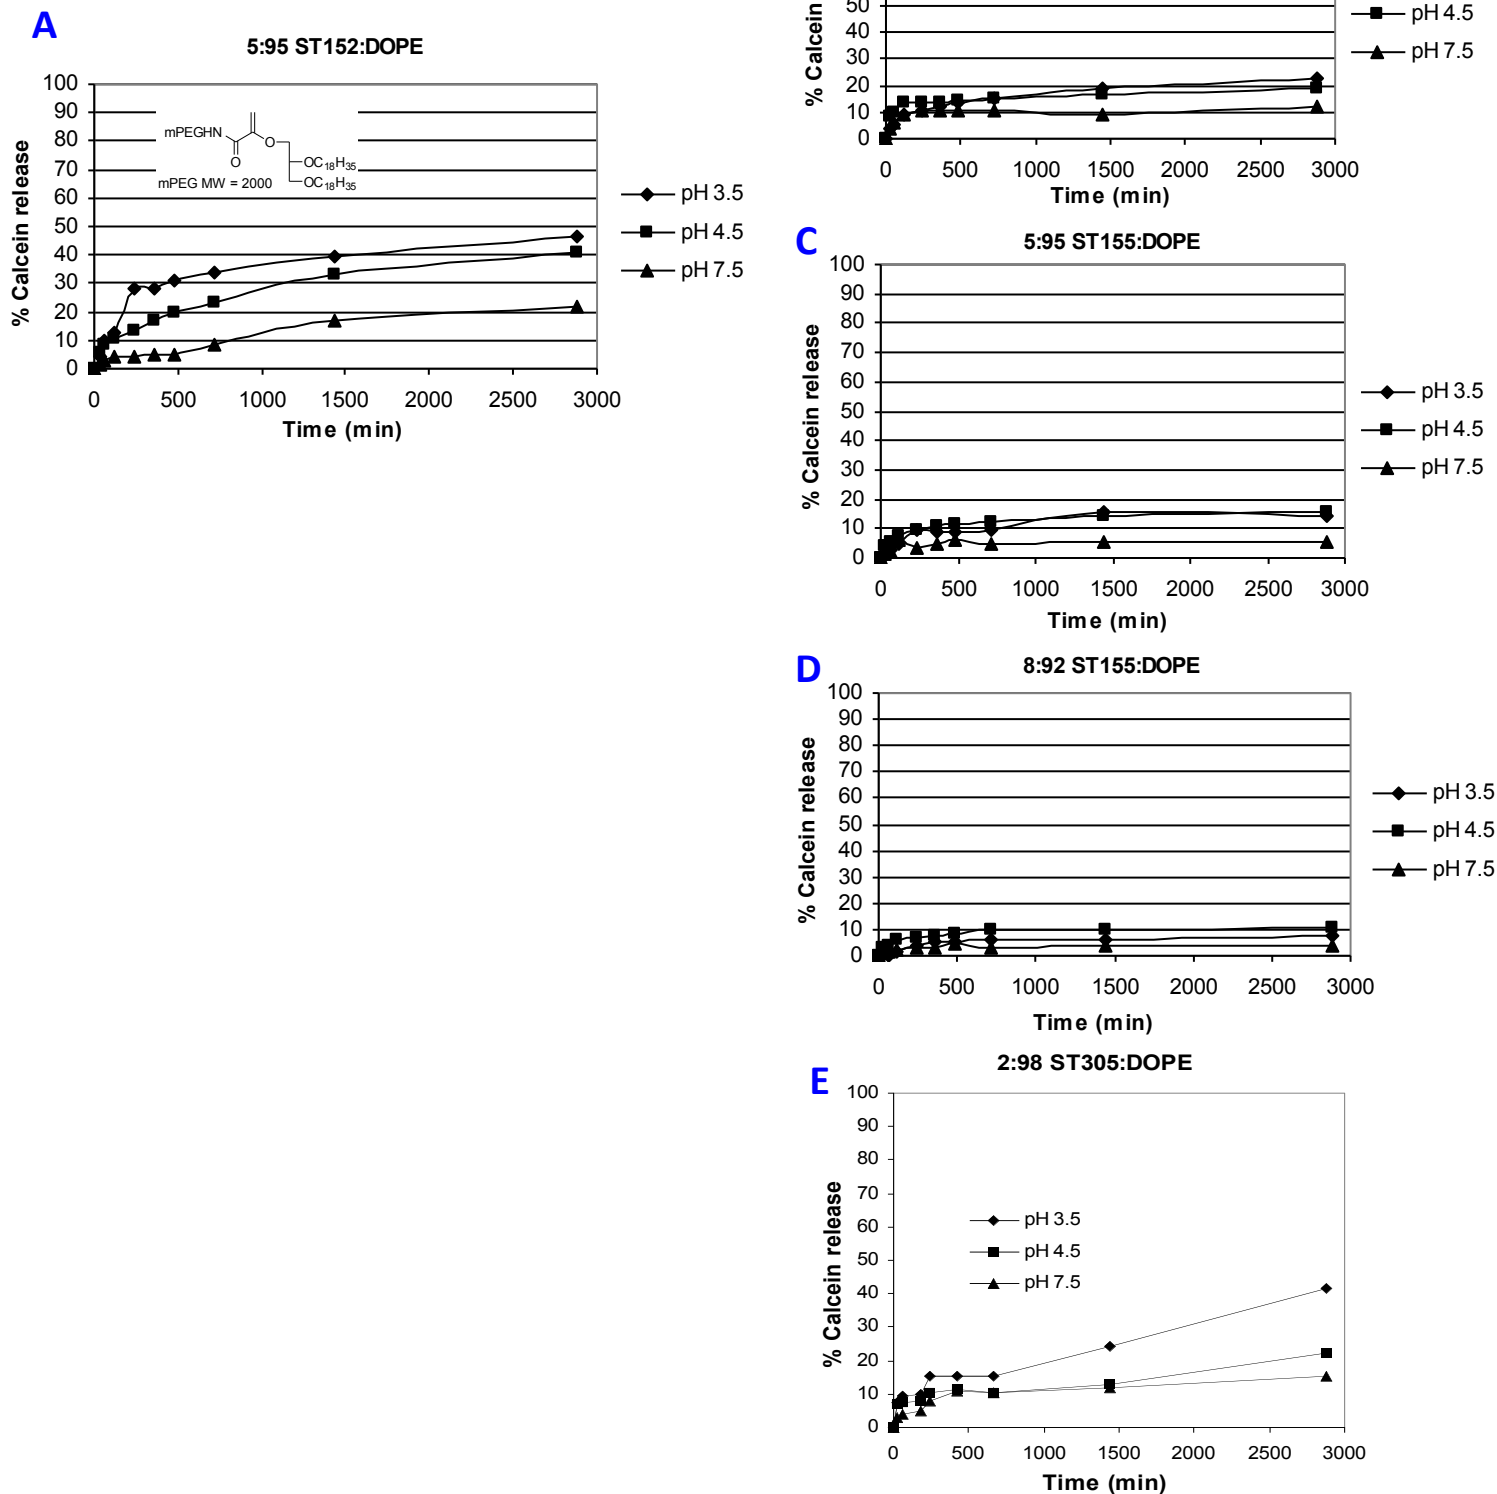

Figure S13. Calcein release rates from DOPE:ST502 and DOPE:ST505 liposomes as a function of pH.

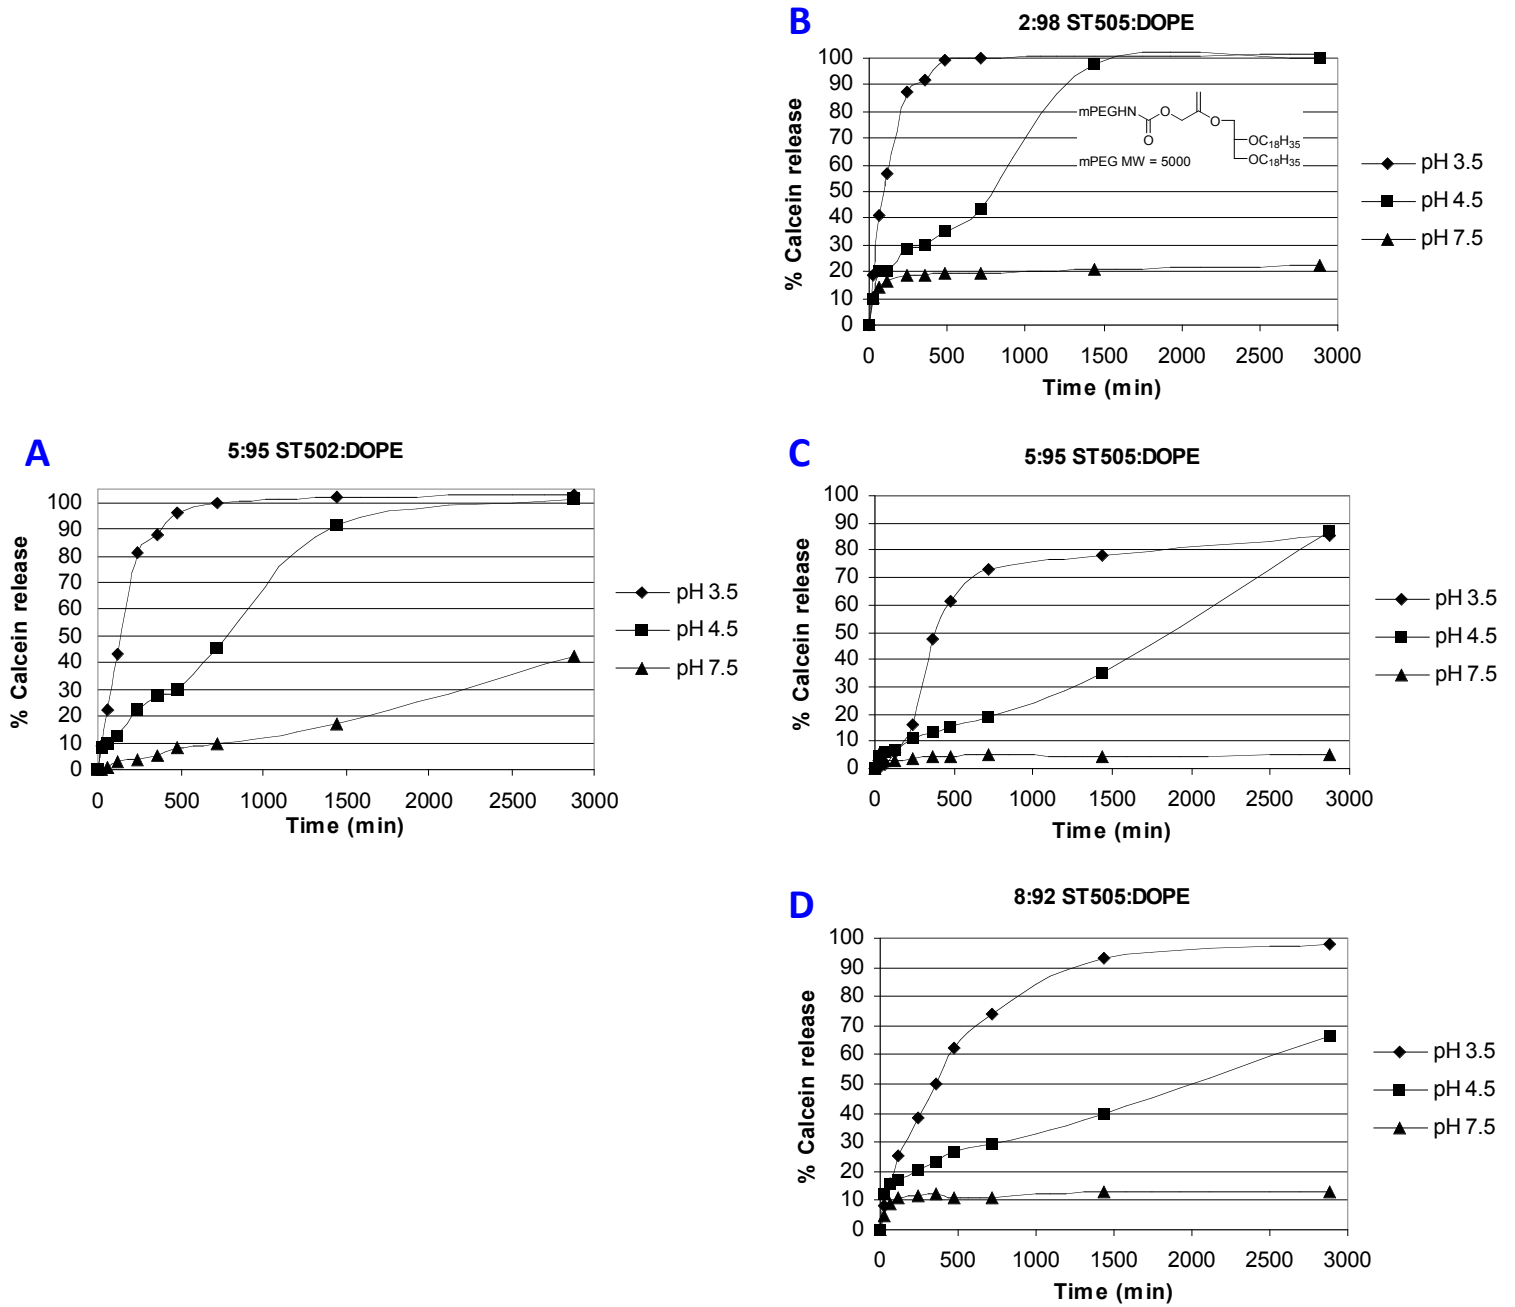



## VI. References

(1) Frisch, M. J.; Trucks, G. W.; Schlegel, H. B.; Scuseria, G. E.; Robb, M. A.; Cheeseman, J. R.; Montgomery, J., J.A.; Vreven, T.; Kudin, K. N.; Burant, J. C.; Millam, J. M.; Iyengar, S. S.; Tomasi, J.; Barone, V.; Mennucci, B.; Cossi, M.; Scalmani, G.; Rega, N.; Petersson, G. A.; Nakatsuji, H.; Hada, M.; Ehara, M.; Toyota, K.; Fukuda, R.; Hasegawa, J.; Ishida, M.; Nakajima, T.; Honda, Y.; Kitao, O.; Nakai, H.; Klene, M.; Li, X.; Knox, J. E.; Hratchian, H. P.; Cross, J. B.; Adamo, C.; Jaramillo, J.; Gomperts, R.; Stratmann, R. E.; Yazyev, O.; Austin, A. J.; Cammi, R.; Pomelli, C.; Ochterski, J. W.; Ayala, P. Y.; Morokuma, K.; Voth, G. A.; Salvador, P.; Dannenberg, J. J.; Zakrzewski, V. G.; Dapprich, S.; Daniels, A. D.; Strain, M. C.; Farkas, O.; Malick, D. K.; Rabuck, A. D.; Raghavachari, K.; Foresman, J. B.; Ortiz, J. V.; Cui, Q.; Baboul, A. G.; Clifford, S.; Cioslowski, J.; Stefanov, B. B.; Liu, G.; Liashenko, A.; Piskorz, P.; Komaromi, I.; Martin, R. L.; Fox, D. J.; Keith, T.; Al-Laham, M. A.; Peng, C. Y.; Nanayakkara, A.; Challacombe, M.; Gill, P. M. W.; Johnson, B.; Chen, W.; Wong, M. W.; Gonzalez, C.; Pople, J. A.; Gaussian 03, Gaussian, Inc.: Wallingford, CT, **2004**.

(2) Lee, C. T.; Yang, W. T.; Parr, R. G. *Phys. Rev. B* **1988**, *37*, 785.

(3) Becke, A. D. *J. Chem. Phys.* **1993**, *98*, 5648.

(4) Kendall, R. A.; Dunning, T. H. Jr.; Harrison, R. J. *J. Chem. Phys.* **1992**, *96*, 6796.
